# Supplementary material for: Theoretical study on the geometry, aromaticity and electronic properties of porphyrin analogues
Source: Royal Society of Chemistry journal article supplement (doi:10.1039/d6ra00486e), 2026-04-13
Supplement: d6ra00486e1.pdf [file d6ra00486e1.pdf]

## *Supporting Information*

# **Theoretical Study on the Geometry, Aromaticity and Electronic Properties of Porphyrin Analogues**

Xiahe Chen,<sup>a</sup> Dawei Li,<sup>a</sup> Chengwei Zhang,<sup>a</sup> Yuanbin She<sup>\*a,b</sup> and Yun-Fang Yang<sup>\*a,c</sup>

<sup>a</sup> College of Chemical Engineering, Zhejiang University of Technology, Hangzhou, Zhejiang 310014, China

<sup>b</sup> State Key Laboratory of Green Chemical Synthesis and Conversion, Hangzhou 310014, China

<sup>c</sup> Zhejiang Key Laboratory of Surface and Interface Science and Engineering for Catalysts, Hangzhou 310014, China

\*E-mail: yangyf@zjut.edu.cn

\*E-mail: sheyb@zjut.edu.cn

### **Table of Contents**

|                                                                                                        |     |
|--------------------------------------------------------------------------------------------------------|-----|
| Method for calculating average bond lengths and bond angles of porphyrin analogues .....               | S2  |
| Optimized geometries of <b>D1</b> , <b>D1-1</b> , and <b>D1-2</b> .....                                | S2  |
| Optimized geometries of fragment 1 and fragment 2 .....                                                | S3  |
| Variation of NICS values for <b>A1–H1</b> as a function of distance from the ring center .             | S3  |
| The line integral convolution (LIC) and bond current strength (BCS) for compounds <b>A1–D1</b> .....   | S4  |
| The line integral convolution (LIC) and bond current strength (BCS) for compounds <b>E1–H1</b> .....   | S4  |
| Variation of NICS values within the same series as a function of distance from the ring center .....   | S5  |
| NICS values for <b>A1</b> .....                                                                        | S5  |
| Calculated NICS(1) and NICS(2) values (ppm) for porphyrin analogues .....                              | S6  |
| Calculated NICS(0) values (ppm) for porphyrin analogues .....                                          | S7  |
| Frontier molecular orbital energies and HOMO–LUMO gaps (in eV) for <b>A1–H1</b> and <b>A2–H2</b> ..... | S8  |
| Frontier molecular orbitals of porphyrin analogues .....                                               | S8  |
| Cartesian coordinates of the structures .....                                                          | S10 |
| Reference .....                                                                                        | S26 |

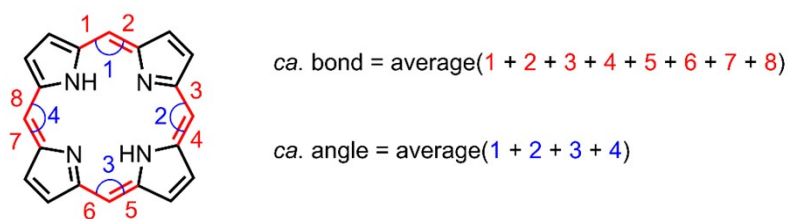

**Figure S1.** Method for calculating average bond lengths and bond angles of porphyrin analogues.

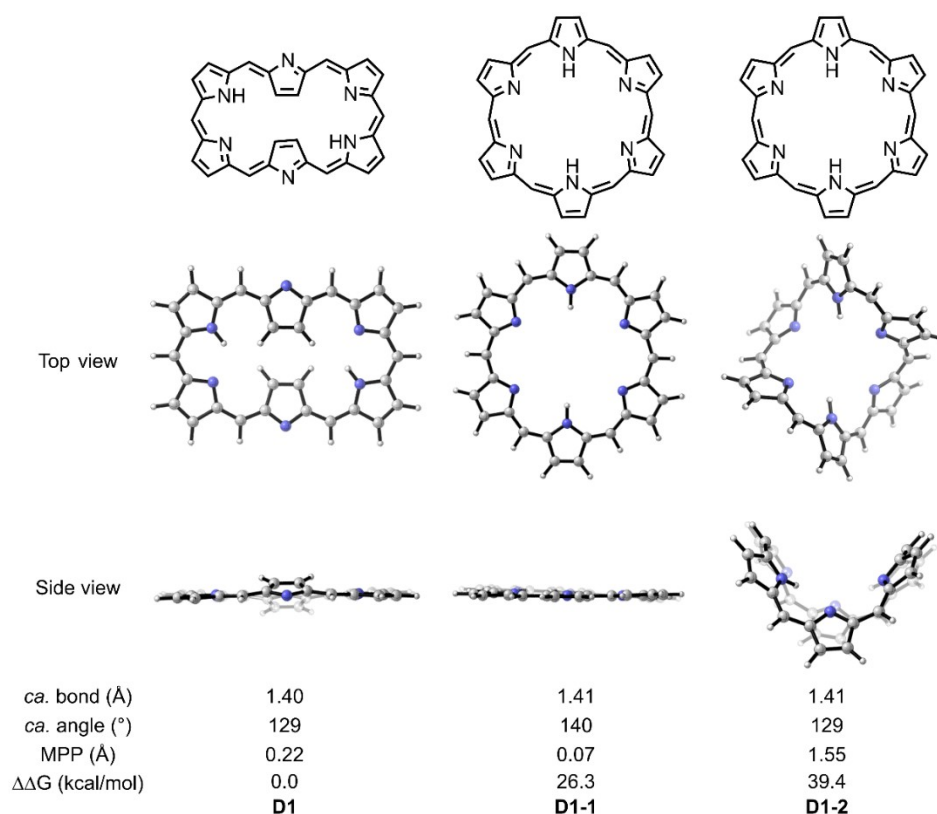

**Figure S2.** Optimized geometries of **D1**, **D1-1**, and **D1-2**. The structure of **D1-1** was optimized with heavy atoms (*meso* atoms,  $N_{\text{pyrrole}}$  atoms, and  $\alpha\text{-C}_{\text{pyrrole}}$  atoms) constrained to maintain planarity. **D1-2** represents the most stable conformation among the circular geometries of **D1**.

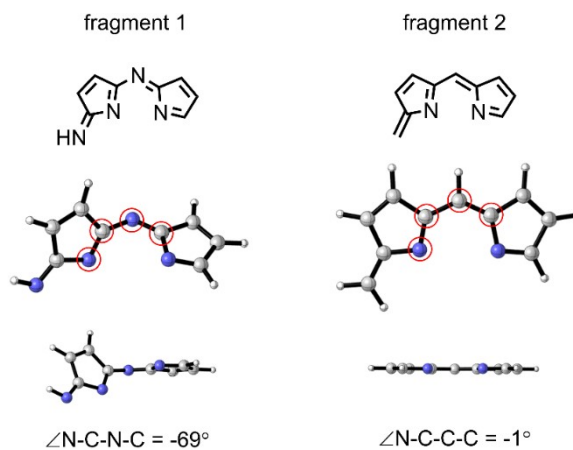

**Figure S3.** Optimized geometries of fragment 1 and fragment 2.

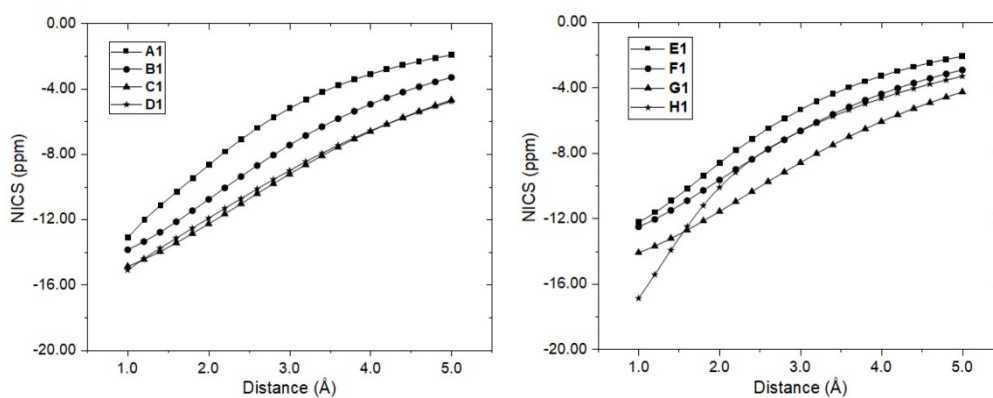

**Figure S4.** Variation of NICS values for A1–H1 as a function of distance from the ring center.

This scanning procedure was performed by placing the probe (Bq) along the axis perpendicular to the molecular plane above and below the ring center of the molecule, starting at 1.0 Å and extending to 5.0 Å with a step size of 0.2 Å. For example, NICS(1) corresponds to the average of the values calculated at 1 Å above and below the ring center.

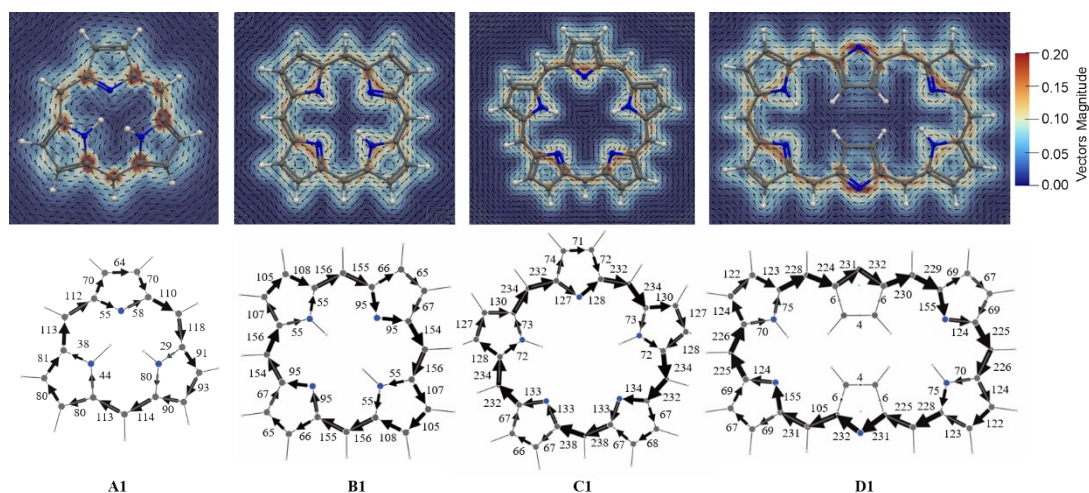

**Figure S5.** The line integral convolution (LIC) (top panels) and bond current strength (BCS) (bottom panels) for compounds **A1–D1**. Values aside each arrow represent the percentage relationship with respect to a reference current strength of 12 nA/T.

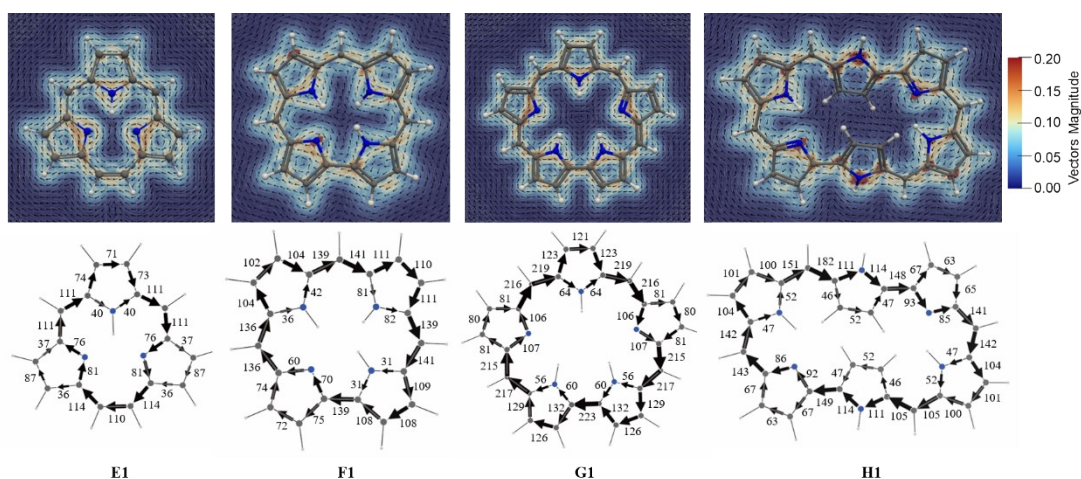

**Figure S6.** The line integral convolution (LIC) (top panels) and bond current strength (BCS) (bottom panels) for compounds **E1–H1**. Values aside each arrow represent the percentage relationship with respect to a reference current strength of 12 nA/T.

The GIMIC calculations were carried out using the GIMIC code. GIMIC employs density matrices obtained from NMR shielding calculations performed with Gaussian 16, which were subsequently transformed into the appropriate format using the Gaussian2gimic.py program written in Python. The line integral convolution (LIC) plots were generated from the corresponding *.pvsm* and *.vti* files using ParaView<sup>1</sup>. In addition, bond current strength (BCS) analyses were performed using the CTOCD-DZ2 method. The BCS is defined as the integral of current density over the plane placed at the midpoint of a bond and perpendicular to it.

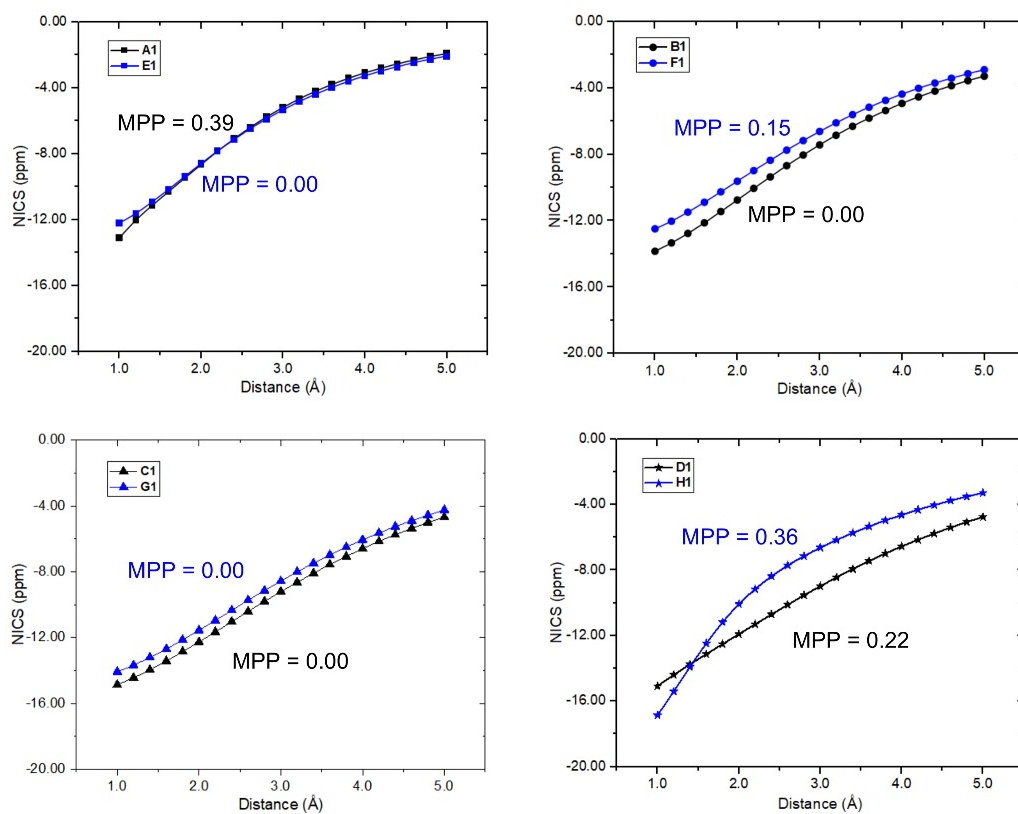

**Figure S7.** Variation of NICS values within the same series as a function of distance from the ring center.

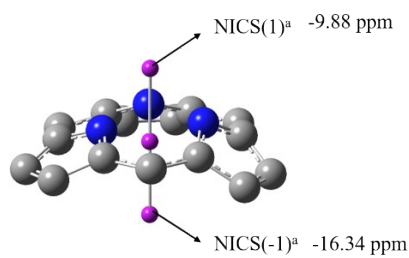

**Figure S8.** NICS values for A1. NICS(1)<sup>a</sup> and NICS(-1)<sup>a</sup> represent the NICS values evaluated 1 Å from the ring center on the convex and concave faces, respectively.

**Table S1.** Calculated NICS(1) and NICS(2) values (ppm) for porphyrin analogues.

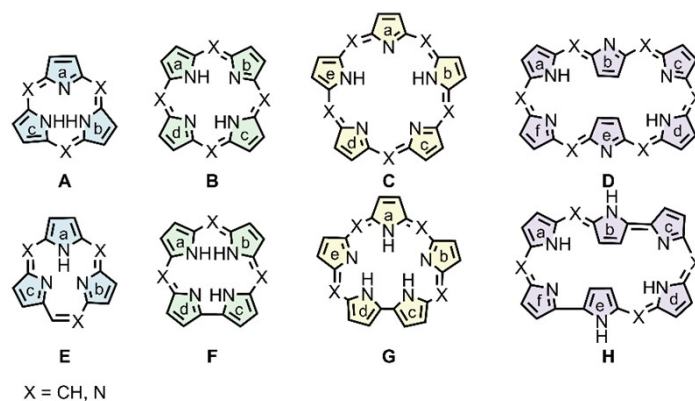

| Molecule  | NICS(1) <sub>a</sub> / | NICS(1) <sub>b</sub> / | NICS(1) <sub>c</sub> / | NICS(1) <sub>d</sub> / | NICS(1) <sub>e</sub> / | NICS(1) <sub>f</sub> / | NICS(1)/      |
|-----------|------------------------|------------------------|------------------------|------------------------|------------------------|------------------------|---------------|
|           | NICS(2) <sub>a</sub>   | NICS(2) <sub>b</sub>   | NICS(2) <sub>c</sub>   | NICS(2) <sub>d</sub>   | NICS(2) <sub>e</sub>   | NICS(2) <sub>f</sub>   | NICS(2)       |
| <b>A1</b> | -9.60/-6.49            | -13.87/-7.84           | -11.77/-6.87           | —                      | —                      | —                      | -13.11/-8.66  |
| <b>B1</b> | -11.99/-6.94           | -6.00/-5.43            | -12.00/-6.94           | -6.00/-5.43            | —                      | —                      | -13.84/-10.75 |
| <b>C1</b> | -4.64/-5.46            | -13.33/-7.70           | -3.94/-5.27            | -3.94/-5.27            | -13.34/-7.70           | —                      | -14.86/-12.26 |
| <b>D1</b> | -12.94/-7.47           | -21.07/-11.17          | -4.46/-5.26            | -12.94/-7.48           | -21.07/-11.17          | -4.46/-5.26            | -15.08/-11.91 |
| <b>E1</b> | -8.97/-5.51            | -3.92/-4.23            | -3.92/-4.23            | —                      | —                      | —                      | -12.21/-8.59  |
| <b>F1</b> | -12.21/-6.76           | -13.36/-7.03           | -13.72/-7.37           | -7.76/-5.70            | —                      | —                      | -12.49/-9.62  |
| <b>G1</b> | -12.90/-7.33           | -6.72/-5.88            | -13.90/-7.68           | -13.90/-7.68           | -6.72/-5.88            | —                      | -14.07/-11.55 |
| <b>H1</b> | -11.58/-6.59           | -11.07/-7.26           | -5.69/-5.10            | -11.58/-6.59           | -11.07/-7.26           | -5.69/-5.11            | -16.86/-10.08 |
| <b>A2</b> | -5.67/-4.38            | -9.70/-5.07            | -9.16/-5.24            | —                      | —                      | —                      | -13.45/-6.63  |
| <b>B2</b> | -9.46/-5.86            | -3.29/-4.27            | -9.46/-5.86            | -3.29/-4.27            | —                      | —                      | -13.80/-10.33 |
| <b>C2</b> | -2.82/-3.64            | -7.02/-4.47            | 0.33/-2.58             | -0.15/-2.69            | -9.12/-5.17            | —                      | -10.29/-8.42  |
| <b>D2</b> | -9.32/-5.73            | -16.56/-9.27           | -1.28/-3.61            | -9.31/-5.73            | -16.56/-9.27           | -1.28/-3.61            | -13.97/-10.20 |
| <b>E2</b> | -6.85/-4.47            | 3.40/-3.72             | -3.71/-3.73            | —                      | —                      | —                      | -10.58/-6.71  |
| <b>F2</b> | -10.46/-6.07           | -12.55/-6.65           | -13.01/-7.18           | -6.26/-5.21            | —                      | —                      | -13.03/-9.66  |
| <b>G2</b> | -11.08/-6.58           | -3.93/-4.77            | -12.43/-7.12           | -12.43/-7.12           | -3.93/-4.77            | —                      | -14.46/-11.61 |
| <b>H2</b> | -9.39/-5.64            | -11.23/-7.41           | -4.26/-4.56            | -9.38/-5.64            | -11.23/-7.41           | -4.26/-4.56            | -16.68/-9.92  |

**Table S2.** Calculated NICS(0) values (ppm) for porphyrin analogues.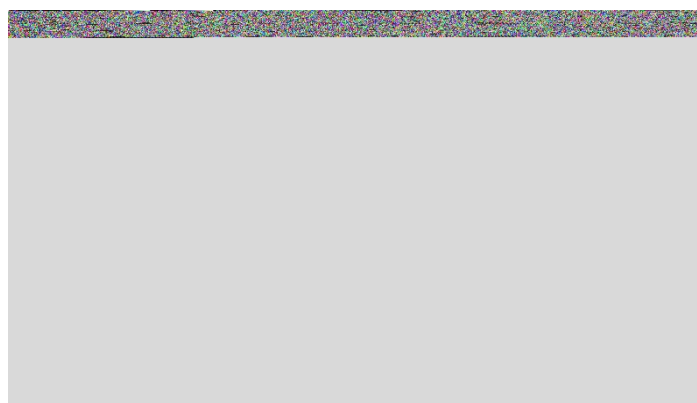

| Molecule  | NICS(0) <sub>a</sub> | NICS(0) <sub>b</sub> | NICS(0) <sub>c</sub> | NICS(0) <sub>d</sub> | NICS(0) <sub>e</sub> | NICS(0) <sub>f</sub> | NICS(0) |
|-----------|----------------------|----------------------|----------------------|----------------------|----------------------|----------------------|---------|
| <b>A1</b> | -7.42                | -15.31               | -11.30               | —                    | —                    | —                    | -18.18  |
| <b>B1</b> | -12.48               | -2.61                | -12.48               | -2.61                | —                    | —                    | -14.92  |
| <b>C1</b> | -0.38                | -13.86               | 0.63                 | 0.63                 | -13.86               | —                    | -15.87  |
| <b>D1</b> | -13.28               | -19.76               | -0.31                | -13.29               | -19.76               | -0.31                | -17.75  |
| <b>E1</b> | -8.32                | -0.27                | -0.27                | —                    | —                    | —                    | -13.40  |
| <b>F1</b> | -13.31               | -14.88               | -15.82               | -5.67                | —                    | —                    | -13.27  |
| <b>G1</b> | -13.73               | -3.59                | -15.42               | -15.42               | -3.59                | —                    | -15.00  |
| <b>H1</b> | -12.27               | -11.88               | -3.21                | -12.27               | -11.88               | -3.21                | -19.89  |
| <b>A2</b> | -4.04                | -12.04               | -9.93                | —                    | —                    | —                    | -12.78  |
| <b>B2</b> | -8.86                | 0.94                 | -8.86                | 0.95                 | —                    | —                    | -15.19  |
| <b>C2</b> | 0.71                 | -6.71                | 4.72                 | 3.60                 | -9.55                | —                    | -11.00  |
| <b>D2</b> | -8.28                | -13.90               | 3.82                 | -8.28                | -13.90               | 3.82                 | -16.60  |
| <b>E2</b> | -4.87                | 1.02                 | -0.76                | —                    | —                    | —                    | -12.12  |
| <b>F2</b> | -10.83               | -13.74               | -14.84               | -3.43                | —                    | —                    | -14.18  |
| <b>G2</b> | -10.94               | 0.12                 | -13.23               | -13.23               | 0.12                 | —                    | -15.56  |
| <b>H2</b> | -9.38                | -11.74               | -1.18                | -9.38                | -11.74               | -1.18                | -18.74  |

**Table S3.** Frontier molecular orbital energies and HOMO–LUMO gaps (in eV) for A1–H1 and A2–H2.

|           | HOMO            |                   | -IP               |                   | LUMO            |                   | -EA               |                   | HOMO-LUMO gap   |                   |                   | (-IP)-(-EA)       |
|-----------|-----------------|-------------------|-------------------|-------------------|-----------------|-------------------|-------------------|-------------------|-----------------|-------------------|-------------------|-------------------|
|           | HF <sup>a</sup> | DFT1 <sup>b</sup> | DFT2 <sup>c</sup> | DFT3 <sup>d</sup> | HF <sup>a</sup> | DFT1 <sup>b</sup> | DFT2 <sup>c</sup> | DFT3 <sup>d</sup> | HF <sup>a</sup> | DFT1 <sup>b</sup> | DFT2 <sup>c</sup> | DFT3 <sup>d</sup> |
| <b>A1</b> | -6.55           | -6.69             | -7.19             | -7.14             | 0.87            | -1.19             | -0.60             | -0.65             | 7.42            | 5.50              | 6.59              | 6.49              |
| <b>B1</b> | -6.18           | -6.52             | -6.98             | -6.91             | 0.07            | -1.80             | -1.27             | -1.32             | 6.25            | 4.71              | 5.71              | 5.59              |
| <b>C1</b> | -5.93           | -6.33             | -6.75             | -6.57             | -0.61           | -2.38             | -1.90             | -1.92             | 5.32            | 3.95              | 4.85              | 4.64              |
| <b>D1</b> | -5.86           | -6.20             | -6.59             | -6.43             | -1.27           | -2.93             | -2.47             | -2.47             | 4.95            | 3.27              | 4.12              | 3.96              |
| <b>E1</b> | -6.86           | -6.99             | -7.49             | -7.42             | 0.17            | -1.88             | -1.31             | -1.34             | 7.03            | 5.11              | 6.19              | 6.08              |
| <b>F1</b> | -6.12           | -6.10             | -6.57             | -6.47             | 0.35            | -1.62             | -1.08             | -1.11             | 6.47            | 4.48              | 5.49              | 5.36              |
| <b>G1</b> | -5.90           | -6.03             | -6.46             | -6.29             | -0.12           | -2.03             | -1.54             | -1.55             | 5.78            | 3.99              | 4.92              | 4.73              |
| <b>H1</b> | -5.29           | -5.41             | -5.81             | -5.75             | -0.54           | -2.22             | -1.74             | -1.71             | 4.75            | 3.19              | 4.07              | 4.04              |
| <b>A2</b> | -6.48           | -6.75             | -7.23             | -7.29             | -0.20           | -2.27             | -1.66             | -1.67             | 6.28            | 4.48              | 5.57              | 5.62              |
| <b>B2</b> | -6.19           | -6.87             | -7.31             | -7.42             | -0.74           | -2.68             | -2.13             | -2.13             | 5.45            | 4.19              | 5.18              | 5.29              |
| <b>C2</b> | -5.90           | -6.42             | -6.83             | -6.89             | -0.85           | -2.99             | -2.46             | -2.55             | 5.04            | 3.43              | 4.37              | 4.34              |
| <b>D2</b> | -5.52           | -6.52             | -6.87             | -7.04             | -1.81           | -3.64             | -3.15             | -3.15             | 3.72            | 2.88              | 3.72              | 3.89              |
| <b>E2</b> | -7.31           | -7.32             | -7.81             | -7.79             | -0.30           | -2.56             | -1.97             | -2.02             | 7.01            | 4.75              | 5.84              | 5.77              |
| <b>F2</b> | -6.23           | -6.59             | -7.05             | -7.06             | -0.36           | -2.30             | -1.75             | -1.73             | 5.87            | 4.29              | 5.30              | 5.33              |
| <b>G2</b> | -5.68           | -6.40             | -6.81             | -6.87             | -0.97           | -2.77             | -2.28             | -2.23             | 4.72            | 3.63              | 4.53              | 4.64              |
| <b>H2</b> | -5.29           | -5.97             | -6.38             | -6.39             | -1.00           | -2.80             | -2.29             | -2.28             | 4.29            | 3.18              | 4.09              | 4.11              |

<sup>a</sup>The energies were calculated at the HF/def2-TZVP level, using geometries optimized at the B3LYP-D3/def2-SVP level.

<sup>b</sup>The energies were calculated at the CAM-B3LYP/def2-TZVPD level, using geometries optimized at the B3LYP-D3/def2-SVP level.

<sup>c</sup>The energies were calculated at the wB97XD/def2-TZVPD level, using geometries optimized at the B3LYP-D3/def2-SVP level.

<sup>d</sup>The energies were calculated at the B3LYP-D3/def2-TZVP level, using geometries optimized at the B3LYP-D3/def2-SVP level.

**Table S4.** Frontier molecular orbitals of porphyrin analogues.

| Molecule  | HOMO-1 (eV)                                                                                  | HOMO (eV)                                                                                    | LUMO (eV)                                                                                     | LUMO+1 (eV)                                                                                   |
|-----------|----------------------------------------------------------------------------------------------|----------------------------------------------------------------------------------------------|-----------------------------------------------------------------------------------------------|-----------------------------------------------------------------------------------------------|
| <b>A1</b> | 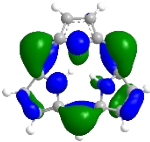<br>-7.19 | <br>-6.55 | <br>0.87  | <br>1.00 |
| <b>A2</b> | <br>-9.31 | <br>-6.48 | <br>-0.20 | <br>0.23 |
| <b>B1</b> | <br>-6.75 | <br>-6.18 | <br>0.07  | <br>0.14 |

|           |                                                                                              |                                                                                              |                                                                                               |                                                                                                |
|-----------|----------------------------------------------------------------------------------------------|----------------------------------------------------------------------------------------------|-----------------------------------------------------------------------------------------------|------------------------------------------------------------------------------------------------|
| <b>B2</b> | 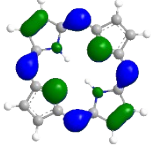<br>-9.15   | <br>-6.19   | <br>-0.74   | <br>-0.48   |
| <b>C1</b> | <br>-6.47   | <br>-5.93   | <br>-0.61   | <br>-0.55   |
| <b>C2</b> | <br>-9.01   | <br>-5.90   | <br>-0.85   | <br>-0.50   |
| <b>D1</b> | <br>-6.28  | <br>-5.86  | <br>-1.27  | <br>-0.97  |
| <b>D2</b> | <br>-8.81 | <br>-5.52 | <br>-1.81 | <br>-1.57 |
| <b>E1</b> | <br>-7.72 | <br>-6.86 | <br>0.17  | <br>0.55  |
| <b>E2</b> | <br>-9.17 | <br>-7.31 | <br>-0.30 | <br>0.13  |
| <b>F1</b> | <br>-6.35 | <br>-6.12 | <br>0.35  | <br>0.93  |

|           |                                                                                              |                                                                                              |                                                                                               |                                                                                                |
|-----------|----------------------------------------------------------------------------------------------|----------------------------------------------------------------------------------------------|-----------------------------------------------------------------------------------------------|------------------------------------------------------------------------------------------------|
| <b>F2</b> | 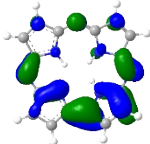<br>-7.43   | <br>-6.23   | <br>-0.36   | <br>0.19    |
| <b>G1</b> | <br>-6.24   | <br>-5.90   | <br>-0.12   | <br>0.24    |
| <b>G2</b> | <br>-7.70   | <br>-5.68   | <br>-0.97   | <br>-0.39   |
| <b>H1</b> | <br>-5.50  | <br>-5.29  | <br>-0.54  | <br>0.20   |
| <b>H2</b> | <br>-6.86 | <br>-5.29 | <br>-1.00 | <br>-0.45 |

### Cartesian coordinates of the structures

#### A1

|   |           |           |           |
|---|-----------|-----------|-----------|
| C | 2.670845  | -0.406676 | 0.101199  |
| C | 1.843779  | -1.552909 | 0.204803  |
| N | 0.591155  | -1.487092 | 0.770379  |
| N | 0.875535  | 1.119001  | 0.612432  |
| C | 2.151952  | 0.909498  | 0.212749  |
| N | -1.419704 | 0.264676  | 0.529651  |
| C | -1.895756 | 1.466358  | 0.096950  |
| C | -0.970249 | 2.536830  | -0.022282 |
| C | 0.428204  | 2.312173  | 0.141776  |
| C | -0.296688 | -2.375681 | 0.206477  |
| C | -1.682894 | -2.098732 | 0.091601  |
| C | -2.206846 | -0.786935 | 0.175117  |
| C | 1.572935  | 3.019037  | -0.430962 |

|   |           |           |           |
|---|-----------|-----------|-----------|
| C | 2.639860  | 2.152188  | -0.386432 |
| C | 1.827420  | -2.769321 | -0.563791 |
| C | 0.531762  | -3.268213 | -0.561867 |
| C | -3.224753 | 1.188641  | -0.404171 |
| C | -3.416856 | -0.183523 | -0.349854 |
| H | 3.662881  | -0.537252 | -0.336421 |
| H | 0.370569  | -0.796543 | 1.470889  |
| H | -0.367144 | 0.312021  | 0.658055  |
| H | -1.311195 | 3.488126  | -0.434536 |
| H | -2.324097 | -2.879301 | -0.322002 |
| H | 1.553912  | 4.012054  | -0.880000 |
| H | 3.638586  | 2.319078  | -0.789800 |
| H | 2.662495  | -3.141209 | -1.155351 |
| H | 0.158616  | -4.102590 | -1.153620 |
| H | -3.920072 | 1.923399  | -0.807981 |
| H | -4.289746 | -0.730284 | -0.704341 |

## A2

|   |           |           |           |
|---|-----------|-----------|-----------|
| C | -1.055327 | -1.985132 | 0.203005  |
| N | 0.062903  | -1.285682 | 0.606686  |
| N | -1.224160 | 0.520161  | -0.660413 |
| C | -2.275451 | -0.099573 | -0.080250 |
| N | 1.203763  | 0.671518  | -0.680962 |
| C | 1.053596  | 1.995369  | -0.344718 |
| C | -1.251716 | 1.835990  | -0.342742 |
| C | 1.237597  | -1.880134 | 0.210887  |
| C | 2.291677  | 0.109400  | -0.063721 |
| C | -2.557944 | 2.126244  | 0.278647  |
| C | -3.204107 | 0.924725  | 0.421623  |
| C | -0.539300 | -3.273354 | -0.215190 |
| C | 0.844348  | -3.208384 | -0.214825 |
| C | 2.310857  | 2.371930  | 0.277361  |
| C | 3.073505  | 1.225725  | 0.430769  |
| H | 0.006297  | -0.338412 | 0.944806  |
| H | 0.308557  | 0.209010  | -0.969953 |
| H | -2.884342 | 3.107283  | 0.621449  |
| H | -4.152457 | 0.727325  | 0.918441  |
| H | -1.161008 | -4.089568 | -0.577089 |
| H | 1.540517  | -3.962903 | -0.575260 |
| H | 2.542117  | 3.371511  | 0.641108  |
| H | 4.026271  | 1.129435  | 0.947242  |
| N | 2.399191  | -1.217559 | 0.134709  |
| N | -2.270438 | -1.436946 | 0.123927  |
| N | -0.141597 | 2.604147  | -0.283349 |

**B1**

|   |           |           |           |
|---|-----------|-----------|-----------|
| C | -0.681594 | 4.259984  | 0.000047  |
| C | 0.677889  | 4.260527  | -0.000170 |
| C | 1.083726  | 2.854700  | -0.000042 |
| N | -0.000912 | 2.033965  | -0.000121 |
| C | -1.086293 | 2.853824  | -0.000007 |
| C | -4.266098 | -0.689487 | -0.000048 |
| C | -4.266722 | 0.685691  | -0.000010 |
| C | -2.898744 | 1.127026  | 0.000065  |
| N | -2.120039 | -0.000925 | 0.000134  |
| C | -2.897721 | -1.129582 | 0.000033  |
| C | -2.426574 | 2.440655  | 0.000088  |
| C | 0.681676  | -4.259935 | 0.000010  |
| C | -0.677808 | -4.260579 | -0.000096 |
| C | -1.083733 | -2.854773 | -0.000038 |
| N | 0.000932  | -2.033969 | -0.000250 |
| C | 1.086288  | -2.853756 | -0.000031 |
| C | -2.424377 | -2.442787 | 0.000067  |
| C | 4.266115  | 0.689503  | 0.000042  |
| C | 4.266738  | -0.685704 | 0.000089  |
| C | 2.898818  | -1.126954 | 0.000008  |
| N | 2.119840  | 0.000926  | 0.000211  |
| C | 2.897800  | 1.129515  | 0.000016  |
| C | 2.424306  | 2.442703  | -0.000067 |
| C | 2.426503  | -2.440570 | -0.000033 |
| H | -1.361108 | 5.111884  | 0.000156  |
| H | 1.356730  | 5.112961  | -0.000303 |
| H | -5.125425 | -1.357731 | -0.000127 |
| H | -5.126657 | 1.353152  | -0.000046 |
| H | -1.100985 | -0.000433 | 0.000348  |
| H | -3.188280 | 3.223301  | 0.000133  |
| H | 1.361261  | -5.111776 | 0.000078  |
| H | -1.356579 | -5.113071 | -0.000038 |
| H | -3.185387 | -3.226110 | 0.000145  |
| H | 5.125364  | 1.357853  | 0.000053  |
| H | 5.126593  | -1.353273 | 0.000135  |
| H | 1.100812  | 0.000440  | 0.000405  |
| H | 3.185425  | 3.225940  | -0.000187 |
| H | 3.188324  | -3.223123 | -0.000101 |

**B2**

|   |           |           |           |
|---|-----------|-----------|-----------|
| C | 0.679050  | -4.155513 | -0.000036 |
| C | -0.675572 | -4.156075 | -0.000032 |

|   |           |           |           |
|---|-----------|-----------|-----------|
| C | -1.083581 | -2.741318 | -0.000001 |
| N | 0.000813  | -1.920279 | -0.000001 |
| C | 1.085883  | -2.740417 | -0.000019 |
| C | 4.157328  | 0.686177  | -0.000001 |
| C | 4.157906  | -0.682705 | -0.000010 |
| C | 2.778282  | -1.129423 | -0.000017 |
| N | 1.999634  | 0.000827  | -0.000023 |
| C | 2.777328  | 1.131733  | -0.000010 |
| C | -0.679051 | 4.155514  | -0.000005 |
| C | 0.675571  | 4.156075  | -0.000012 |
| C | 1.083578  | 2.741317  | 0.000004  |
| N | -0.000812 | 1.920279  | 0.000018  |
| C | -1.085886 | 2.740419  | 0.000017  |
| C | -4.157327 | -0.686178 | 0.000039  |
| C | -4.157905 | 0.682706  | 0.000039  |
| C | -2.778282 | 1.129422  | 0.000033  |
| N | -1.999634 | -0.000827 | -0.000002 |
| C | -2.777328 | -1.131731 | 0.000023  |
| H | 1.377120  | -4.990475 | -0.000053 |
| H | -1.372948 | -4.991616 | -0.000042 |
| H | 5.003148  | 1.370069  | 0.000007  |
| H | 5.004303  | -1.365883 | -0.000010 |
| H | 0.982702  | 0.000394  | -0.000027 |
| H | -1.377120 | 4.990476  | -0.000012 |
| H | 1.372948  | 4.991615  | -0.000028 |
| H | -5.003148 | -1.370068 | 0.000046  |
| H | -5.004303 | 1.365882  | 0.000046  |
| H | -0.982702 | -0.000394 | -0.000030 |
| N | 2.371884  | -2.385169 | -0.000023 |
| N | -2.369874 | -2.387138 | 0.000013  |
| N | -2.371884 | 2.385169  | 0.000030  |
| N | 2.369876  | 2.387138  | -0.000006 |

## **C1**

|   |          |           |           |
|---|----------|-----------|-----------|
| C | 1.074412 | -3.623311 | -0.000250 |
| C | 2.443194 | -3.326745 | 0.002612  |
| C | 3.212425 | -2.163204 | 0.003750  |
| C | 4.648889 | -2.215108 | 0.006059  |
| C | 5.121779 | -0.931485 | 0.005472  |
| C | 3.992360 | -0.048060 | 0.002895  |
| C | 4.110818 | 1.339021  | 0.000875  |
| C | 3.148445 | 2.354306  | -0.001760 |
| C | 3.560272 | 3.761415  | -0.004740 |
| C | 2.409732 | 4.471323  | -0.006388 |

|   |           |           |           |
|---|-----------|-----------|-----------|
| C | 1.314827  | 3.482976  | -0.004135 |
| C | 0.002613  | 3.981698  | -0.003761 |
| C | -1.310212 | 3.484610  | -0.000773 |
| C | -2.403890 | 4.474307  | 0.001085  |
| C | -3.555301 | 3.765825  | 0.004399  |
| C | -3.145206 | 2.358191  | 0.003916  |
| C | -4.108901 | 1.344151  | 0.005306  |
| C | -3.992333 | -0.043088 | 0.003194  |
| C | -5.122999 | -0.924940 | 0.002609  |
| C | -4.651922 | -2.209222 | -0.001026 |
| C | -3.215387 | -2.159326 | -0.002231 |
| C | -2.447724 | -3.323897 | -0.004919 |
| C | -1.079306 | -3.622116 | -0.004303 |
| C | -0.679003 | -5.035772 | -0.005611 |
| C | 0.672511  | -5.036539 | -0.002757 |
| N | -0.001977 | -2.793678 | -0.001325 |
| N | -2.858677 | -0.828644 | 0.000380  |
| N | -1.795784 | 2.216943  | 0.000988  |
| N | 1.798821  | 2.214731  | -0.001633 |
| N | 2.857594  | -0.832017 | 0.002201  |
| H | 3.072566  | -4.220299 | 0.003839  |
| H | 5.220991  | -3.140956 | 0.007677  |
| H | 6.156775  | -0.595086 | 0.006575  |
| H | 5.147336  | 1.685161  | 0.001206  |
| H | 4.588812  | 4.120900  | -0.005387 |
| H | 2.278784  | 5.553165  | -0.008643 |
| H | 0.003295  | 5.075798  | -0.005582 |
| H | -2.271602 | 5.555989  | 0.000110  |
| H | -4.583393 | 4.126583  | 0.006651  |
| H | -5.144953 | 1.691674  | 0.007523  |
| H | -6.157520 | -0.587086 | 0.004531  |
| H | -5.225322 | -3.134268 | -0.002507 |
| H | -3.078229 | -4.216647 | -0.007127 |
| H | -1.362435 | -5.884373 | -0.008067 |
| H | 1.355021  | -5.885881 | -0.002361 |
| H | -1.909891 | -0.457067 | -0.000101 |
| H | 1.909362  | -0.459030 | 0.000273  |

## **C2**

|   |          |           |           |
|---|----------|-----------|-----------|
| C | 0.974461 | 3.385910  | -0.159935 |
| C | 2.860017 | 2.045641  | -0.755393 |
| C | 4.236806 | 2.006781  | -1.233289 |
| C | 4.747756 | 0.781086  | -0.954929 |
| C | 3.697652 | -0.011225 | -0.332098 |

|   |           |           |           |
|---|-----------|-----------|-----------|
| C | 2.951608  | -2.056077 | 0.546528  |
| C | 3.299971  | -3.247343 | 1.363497  |
| C | 2.160789  | -3.954547 | 1.467757  |
| C | 1.141196  | -3.199541 | 0.684824  |
| C | -1.094256 | -3.288753 | -0.184232 |
| C | -1.986129 | -4.234507 | -0.909302 |
| C | -3.071338 | -3.518199 | -1.258674 |
| C | -2.843611 | -2.162515 | -0.708367 |
| C | -3.723139 | -0.032583 | -0.245790 |
| C | -4.881609 | 0.767758  | 0.047728  |
| C | -4.444928 | 1.955619  | 0.568481  |
| C | -3.004029 | 1.954391  | 0.536807  |
| C | -1.036059 | 3.314297  | 0.592515  |
| C | -0.593661 | 4.706927  | 0.765406  |
| C | 0.650134  | 4.764276  | 0.241037  |
| N | -0.041053 | 2.526306  | 0.067442  |
| N | -2.606663 | 0.714727  | 0.060770  |
| N | -1.617338 | -2.053629 | -0.113644 |
| N | 1.656490  | -2.026480 | 0.201344  |
| N | 2.564027  | 0.773903  | -0.280233 |
| H | 4.723492  | 2.877399  | -1.667423 |
| H | 5.752441  | 0.395666  | -1.112928 |
| H | 4.296131  | -3.454217 | 1.750577  |
| H | 1.965797  | -4.907595 | 1.956215  |
| H | -1.751554 | -5.284245 | -1.076053 |
| H | -3.973616 | -3.818120 | -1.788350 |
| H | -5.896926 | 0.416959  | -0.120715 |
| H | -5.019973 | 2.814204  | 0.907384  |
| H | -1.221453 | 5.492958  | 1.180451  |
| H | 1.330792  | 5.605632  | 0.126993  |
| H | -1.647751 | 0.378417  | -0.017830 |
| H | 1.652666  | 0.459484  | 0.049711  |
| N | -3.807190 | -1.266883 | -0.724643 |
| N | 0.000167  | -3.764793 | 0.401611  |
| N | 3.903521  | -1.208213 | 0.155038  |
| N | 2.187456  | 3.153920  | -0.682490 |
| N | -2.305106 | 3.031010  | 0.825741  |

**D1**

|   |           |          |           |
|---|-----------|----------|-----------|
| C | -5.845231 | 2.576759 | 0.107896  |
| C | -4.851218 | 3.501290 | 0.160279  |
| C | -3.591025 | 2.759052 | 0.052232  |
| N | -3.825447 | 1.421377 | -0.035010 |
| C | -5.177224 | 1.279859 | 0.002554  |

|   |           |           |           |
|---|-----------|-----------|-----------|
| C | -4.902458 | -3.446738 | -0.129744 |
| C | -5.892809 | -2.494472 | -0.110501 |
| C | -5.257931 | -1.210711 | -0.030150 |
| N | -3.902695 | -1.431256 | 0.024652  |
| C | -3.631230 | -2.779567 | -0.035048 |
| C | -5.855700 | 0.051114  | -0.023505 |
| C | -2.390777 | -3.422281 | -0.025773 |
| C | -2.349788 | 3.414166  | 0.056785  |
| C | 1.062277  | -2.902784 | 0.153846  |
| N | -0.023174 | -3.682138 | -0.066035 |
| C | -1.103869 | -2.901514 | 0.169698  |
| C | -0.694331 | -1.562821 | 0.627533  |
| C | 0.664217  | -1.566888 | 0.618343  |
| C | -1.062281 | 2.902768  | -0.154380 |
| N | 0.023135  | 3.682275  | 0.064818  |
| C | 1.103860  | 2.901489  | -0.170495 |
| C | 0.694266  | 1.562499  | -0.627381 |
| C | -0.664283 | 1.566583  | -0.618007 |
| C | 5.845315  | -2.576731 | -0.106180 |
| C | 4.851305  | -3.501259 | -0.159131 |
| C | 3.591080  | -2.758935 | -0.051800 |
| N | 3.825492  | -1.421341 | 0.035558  |
| C | 5.177334  | -1.279882 | -0.001341 |
| C | 2.349763  | -3.414038 | -0.057366 |
| C | 4.902432  | 3.446800  | 0.128650  |
| C | 5.892777  | 2.494477  | 0.110204  |
| C | 5.257895  | 1.210732  | 0.030368  |
| N | 3.902670  | 1.431277  | -0.024813 |
| C | 3.631236  | 2.779598  | 0.034076  |
| C | 2.390750  | 3.422356  | 0.024444  |
| C | 5.855685  | -0.051104 | 0.024654  |
| H | -6.922809 | 2.732093  | 0.149677  |
| H | -4.934491 | 4.584111  | 0.247188  |
| H | -5.015764 | -4.527730 | -0.187761 |
| H | -6.969386 | -2.647624 | -0.156230 |
| H | -3.262961 | -0.632981 | 0.024307  |
| H | -6.947212 | 0.073852  | -0.032667 |
| H | -2.419701 | -4.496100 | -0.226748 |
| H | -2.374071 | 4.486212  | 0.272224  |
| H | -1.341475 | -0.754712 | 0.962808  |
| H | 1.346199  | -0.780268 | 0.925883  |
| H | 1.341288  | 0.754080  | -0.962137 |
| H | -1.346296 | 0.779883  | -0.925247 |
| H | 6.922904  | -2.732139 | -0.147396 |

|   |          |           |           |
|---|----------|-----------|-----------|
| H | 4.934602 | -4.584089 | -0.245853 |
| H | 2.374125 | -4.485934 | -0.273542 |
| H | 5.015742 | 4.527818  | 0.186134  |
| H | 6.969354 | 2.647613  | 0.156026  |
| H | 3.262900 | 0.633053  | -0.024435 |
| H | 2.419755 | 4.496296  | 0.224753  |
| H | 6.947202 | -0.073702 | 0.034264  |

**D2**

|   |           |           |           |
|---|-----------|-----------|-----------|
| C | -5.704711 | 2.458005  | 0.057891  |
| C | -4.742196 | 3.405033  | 0.103136  |
| C | -3.451375 | 2.683325  | 0.063284  |
| N | -3.650418 | 1.332769  | 0.010059  |
| C | -4.994799 | 1.166295  | 0.014087  |
| C | -4.709255 | -3.401733 | -0.111105 |
| C | -5.686617 | -2.452014 | -0.069578 |
| C | -5.039821 | -1.155846 | -0.012263 |
| N | -3.679248 | -1.375862 | 0.015563  |
| C | -3.417440 | -2.733809 | -0.054600 |
| C | 1.099432  | -2.867169 | 0.110507  |
| N | 0.017724  | -3.588822 | -0.250624 |
| C | -1.057757 | -2.875195 | 0.117943  |
| C | -0.655747 | -1.616799 | 0.823879  |
| C | 0.694139  | -1.617170 | 0.824244  |
| C | -1.099424 | 2.867185  | -0.110695 |
| N | -0.017771 | 3.588866  | 0.250412  |
| C | 1.057770  | 2.875153  | -0.117950 |
| C | 0.655790  | 1.616673  | -0.823732 |
| C | -0.694099 | 1.617071  | -0.824206 |
| C | 5.704711  | -2.457992 | -0.057964 |
| C | 4.742176  | -3.404997 | -0.103350 |
| C | 3.451374  | -2.683260 | -0.063510 |
| N | 3.650416  | -1.332745 | -0.010167 |
| C | 4.994830  | -1.166272 | -0.014103 |
| C | 4.709221  | 3.401733  | 0.111377  |
| C | 5.686611  | 2.452019  | 0.069855  |
| C | 5.039838  | 1.155869  | 0.012419  |
| N | 3.679268  | 1.375867  | -0.015470 |
| C | 3.417441  | 2.733801  | 0.054747  |
| H | -6.788387 | 2.558019  | 0.063075  |
| H | -4.824695 | 4.488866  | 0.155033  |
| H | -4.801492 | -4.483980 | -0.169068 |
| H | -6.767158 | -2.574887 | -0.088258 |
| H | -3.048355 | -0.567233 | 0.000355  |

|   |           |           |           |
|---|-----------|-----------|-----------|
| H | -1.316374 | -0.885545 | 1.286887  |
| H | 1.374929  | -0.896608 | 1.269092  |
| H | 1.316423  | 0.885333  | -1.286595 |
| H | -1.374862 | 0.896458  | -1.269011 |
| H | 6.788385  | -2.558032 | -0.063091 |
| H | 4.824658  | -4.488827 | -0.155334 |
| H | 4.801447  | 4.483977  | 0.169410  |
| H | 6.767147  | 2.574914  | 0.088612  |
| H | 3.048386  | 0.567226  | -0.000365 |
| N | -2.312800 | 3.343994  | 0.134192  |
| N | 2.275840  | 3.366996  | 0.110949  |
| N | 2.312765  | -3.343914 | -0.134545 |
| N | -2.275879 | -3.367023 | -0.110853 |
| N | -5.659136 | 0.006146  | -0.007037 |
| N | 5.659154  | -0.006147 | 0.007147  |

### **E1**

|   |           |           |           |
|---|-----------|-----------|-----------|
| C | -2.387060 | 1.557807  | 0.000013  |
| C | -2.477239 | 0.150085  | 0.000013  |
| N | -0.000039 | 1.483906  | 0.000443  |
| C | -1.129759 | 2.222149  | 0.000129  |
| C | 2.477232  | 0.150198  | 0.000034  |
| C | 2.386983  | 1.557916  | 0.000007  |
| C | 1.129648  | 2.222200  | 0.000124  |
| C | 0.693177  | 3.603142  | -0.000158 |
| C | -0.693350 | 3.603111  | -0.000175 |
| C | -3.638971 | -0.751559 | -0.000208 |
| C | -3.133682 | -2.022392 | -0.000139 |
| C | -1.661518 | -1.891066 | 0.000028  |
| N | -1.347512 | -0.600598 | 0.000133  |
| N | 1.347544  | -0.600541 | 0.000191  |
| C | 1.661612  | -1.890993 | 0.000035  |
| C | 3.133782  | -2.022248 | -0.000176 |
| C | 3.639008  | -0.751390 | -0.000200 |
| C | -0.699125 | -2.947612 | 0.000065  |
| C | 0.699268  | -2.947581 | 0.000064  |
| H | -3.300110 | 2.156855  | -0.000221 |
| H | -0.000016 | 0.421846  | 0.000490  |
| H | 3.300004  | 2.157007  | -0.000239 |
| H | 1.344305  | 4.476009  | -0.000393 |
| H | -1.344517 | 4.475949  | -0.000427 |
| H | -4.687780 | -0.454934 | -0.000361 |
| H | -3.694874 | -2.957064 | -0.000238 |
| H | 3.695020  | -2.956892 | -0.000320 |

|   |           |           |           |
|---|-----------|-----------|-----------|
| H | 4.687803  | -0.454713 | -0.000364 |
| H | -1.147927 | -3.947036 | -0.000014 |
| H | 1.148114  | -3.946986 | -0.000023 |

**E2**

|   |           |           |           |
|---|-----------|-----------|-----------|
| C | -2.334750 | -0.412290 | -0.263491 |
| N | -0.327118 | 1.400303  | -0.516541 |
| C | -1.605174 | 1.770784  | -0.284879 |
| C | 2.227730  | 0.743872  | 0.192129  |
| C | 0.569869  | 2.314307  | -0.034104 |
| C | -0.223292 | 3.504520  | 0.294679  |
| C | -1.545757 | 3.170364  | 0.158867  |
| C | -3.183134 | -1.460741 | 0.361538  |
| C | -2.389166 | -2.552483 | 0.489788  |
| C | -1.061888 | -2.172458 | -0.068428 |
| N | -1.140326 | -0.932429 | -0.598858 |
| N | 1.346326  | -0.263552 | 0.247884  |
| C | 1.993623  | -1.416548 | 0.040223  |
| C | 3.441525  | -1.151681 | -0.070128 |
| C | 3.588981  | 0.203906  | 0.038562  |
| C | 1.307662  | -2.651564 | -0.097685 |
| H | -0.130424 | 0.373467  | -0.612341 |
| H | 0.197049  | 4.437457  | 0.665202  |
| H | -2.418144 | 3.781231  | 0.383316  |
| H | -4.207766 | -1.311581 | 0.698157  |
| H | -2.610360 | -3.513474 | 0.951043  |
| H | 4.223255  | -1.895300 | -0.224756 |
| H | 4.503425  | 0.791705  | -0.021525 |
| H | 1.950744  | -3.528891 | -0.258304 |
| N | -2.622582 | 0.906693  | -0.225434 |
| N | 1.841884  | 2.050050  | 0.203383  |
| N | 0.012510  | -2.943143 | 0.014821  |

**F1**

|   |           |           |           |
|---|-----------|-----------|-----------|
| C | -3.399874 | -0.562853 | -0.006936 |
| C | 0.807868  | -3.124880 | -0.076569 |
| C | 3.236240  | 1.126231  | 0.045701  |
| C | -1.339012 | 2.386567  | 0.104953  |
| C | -2.549171 | 3.014487  | -0.289769 |
| C | -3.547512 | 2.032171  | -0.335642 |
| C | -2.961061 | 0.782495  | 0.023935  |
| N | -1.656840 | 1.076139  | 0.325849  |
| C | -2.534963 | -1.661733 | 0.008971  |
| C | -2.832215 | -3.055139 | 0.158407  |

|   |           |           |           |
|---|-----------|-----------|-----------|
| C | -1.650796 | -3.768278 | 0.139336  |
| C | -0.560766 | -2.851351 | -0.027434 |
| N | -1.137071 | -1.587904 | -0.088532 |
| C | 1.888351  | -2.217609 | -0.084667 |
| C | 3.288989  | -2.525897 | -0.179483 |
| C | 4.001530  | -1.340901 | -0.139954 |
| C | 3.062055  | -0.268388 | -0.018113 |
| N | 1.812026  | -0.852981 | 0.009109  |
| C | 2.163429  | 2.034092  | 0.130083  |
| C | 2.165315  | 3.483420  | 0.031456  |
| C | 0.845964  | 3.881452  | 0.023083  |
| C | 0.063033  | 2.671013  | 0.135035  |
| N | 0.872725  | 1.595023  | 0.213872  |
| H | -4.470007 | -0.766216 | -0.068762 |
| H | 1.079823  | -4.181998 | -0.086653 |
| H | 4.255528  | 1.512819  | -0.015448 |
| H | -2.656352 | 4.060655  | -0.569534 |
| H | -4.578609 | 2.169649  | -0.656717 |
| H | -0.996859 | 0.449941  | 0.764804  |
| H | -3.835314 | -3.452906 | 0.304233  |
| H | -1.531497 | -4.843428 | 0.263247  |
| H | -0.690109 | -0.829701 | -0.593055 |
| H | 3.689471  | -3.533837 | -0.274774 |
| H | 5.082155  | -1.219793 | -0.194060 |
| H | 1.024557  | -0.201843 | 0.147253  |
| H | 3.047764  | 4.118333  | -0.046087 |
| H | 0.459134  | 4.896996  | -0.050889 |

## **F2**

|   |           |           |           |
|---|-----------|-----------|-----------|
| C | 1.309358  | 2.367221  | -0.184677 |
| C | 2.493400  | 2.950802  | 0.360470  |
| C | 3.463533  | 1.953056  | 0.450760  |
| C | 2.886388  | 0.724623  | -0.015944 |
| N | 1.637976  | 1.067587  | -0.466399 |
| C | 2.487446  | -1.556689 | 0.006478  |
| C | 2.796991  | -2.949047 | -0.162675 |
| C | 1.621412  | -3.670865 | -0.157173 |
| C | 0.519639  | -2.767283 | 0.027803  |
| N | 1.086208  | -1.492880 | 0.105065  |
| C | -1.771118 | -2.211195 | 0.084726  |
| C | -3.174876 | -2.519690 | 0.243919  |
| C | -3.889207 | -1.342182 | 0.207874  |
| C | -2.953728 | -0.259961 | 0.015829  |
| N | -1.703230 | -0.844988 | -0.054838 |

|   |           |           |           |
|---|-----------|-----------|-----------|
| C | -2.163170 | 1.910034  | -0.163577 |
| C | -2.214907 | 3.357940  | 0.035462  |
| C | -0.916748 | 3.806588  | 0.020267  |
| C | -0.088713 | 2.635516  | -0.217961 |
| N | -0.868930 | 1.539847  | -0.358685 |
| H | 2.583656  | 3.976910  | 0.711663  |
| H | 4.458945  | 2.036605  | 0.881453  |
| H | 0.986592  | 0.455008  | -0.935292 |
| H | 3.809387  | -3.319170 | -0.309771 |
| H | 1.493220  | -4.742309 | -0.295886 |
| H | 0.626259  | -0.734135 | 0.596332  |
| H | -3.550088 | -3.530602 | 0.388326  |
| H | -4.963314 | -1.204295 | 0.312165  |
| H | -0.940363 | -0.187207 | -0.279064 |
| H | -3.123491 | 3.933404  | 0.204942  |
| H | -0.563555 | 4.827033  | 0.161846  |
| N | 3.332019  | -0.535602 | 0.053431  |
| N | -0.764539 | -3.080475 | 0.076618  |
| N | -3.183996 | 1.048733  | -0.033222 |

## G1

|   |           |           |           |
|---|-----------|-----------|-----------|
| C | 5.096361  | 0.628959  | -0.000248 |
| C | 4.671499  | 1.918162  | -0.000235 |
| C | 3.207633  | 1.869020  | -0.000014 |
| N | 2.758785  | 0.590034  | 0.000048  |
| C | 3.890233  | -0.188353 | -0.000079 |
| C | 1.543854  | -4.311762 | 0.000124  |
| C | 2.858141  | -3.883217 | 0.000024  |
| C | 2.850377  | -2.460495 | 0.000007  |
| N | 1.530365  | -2.061897 | -0.000017 |
| C | 0.707015  | -3.158392 | 0.000089  |
| C | 3.938205  | -1.582525 | -0.000038 |
| C | 0.682785  | 4.778928  | 0.000482  |
| C | -0.683581 | 4.778846  | 0.000403  |
| C | -1.135991 | 3.413359  | -0.000012 |
| N | -0.000267 | 2.623805  | -0.000174 |
| C | 1.135355  | 3.413492  | 0.000088  |
| C | 2.484382  | 3.077071  | 0.000044  |
| C | -2.484962 | 3.076737  | -0.000160 |
| C | -3.937900 | -1.583137 | -0.000048 |
| C | -0.706473 | -3.158512 | 0.000107  |
| N | -1.529970 | -2.062140 | 0.000012  |
| C | -2.849925 | -2.460936 | 0.000020  |
| C | -2.857476 | -3.883672 | 0.000185  |

|   |           |           |           |
|---|-----------|-----------|-----------|
| C | -1.543141 | -4.312019 | 0.000186  |
| C | -3.890164 | -0.188970 | -0.000134 |
| N | -2.758845 | 0.589650  | -0.000137 |
| C | -3.207973 | 1.868544  | -0.000166 |
| C | -4.671858 | 1.917393  | -0.000212 |
| C | -5.096450 | 0.628128  | -0.000145 |
| H | 6.116362  | 0.245968  | -0.000373 |
| H | 5.268490  | 2.829791  | -0.000329 |
| H | 1.186818  | -5.338398 | 0.000174  |
| H | 3.756826  | -4.496806 | -0.000018 |
| H | 1.304556  | -1.064956 | 0.000006  |
| H | 4.926750  | -2.046449 | -0.000453 |
| H | 1.352660  | 5.636804  | 0.000752  |
| H | -1.353553 | 5.636646  | 0.000592  |
| H | -0.000226 | 1.611016  | -0.000363 |
| H | 3.124779  | 3.962668  | 0.000208  |
| H | -3.125515 | 3.962219  | -0.000028 |
| H | -4.926368 | -2.047214 | 0.000020  |
| H | -1.304271 | -1.065178 | -0.000061 |
| H | -3.756067 | -4.497400 | 0.000279  |
| H | -1.185958 | -5.338606 | 0.000267  |
| H | -5.269057 | 2.828889  | -0.000264 |
| H | -6.116386 | 0.244953  | -0.000138 |

## G2

|   |           |           |           |
|---|-----------|-----------|-----------|
| C | 4.982376  | 0.624028  | 0.000820  |
| C | 4.554111  | 1.905831  | 0.000679  |
| C | 3.082890  | 1.848464  | 0.000265  |
| N | 2.632262  | 0.566769  | 0.000181  |
| C | 3.771273  | -0.203059 | 0.000457  |
| C | 1.567557  | -4.226864 | -0.000728 |
| C | 2.866174  | -3.770840 | -0.000413 |
| C | 2.827911  | -2.337780 | 0.000036  |
| N | 1.495748  | -1.970042 | 0.000050  |
| C | 0.701157  | -3.085492 | -0.000429 |
| C | 0.680611  | 4.654445  | -0.000911 |
| C | -0.680428 | 4.654474  | -0.000928 |
| C | -1.137795 | 3.281904  | -0.000400 |
| N | 0.000058  | 2.479856  | -0.000236 |
| C | 1.137918  | 3.281842  | -0.000334 |
| C | -0.701269 | -3.085466 | -0.000366 |
| N | -1.495817 | -1.970001 | -0.000149 |
| C | -2.828009 | -2.337683 | 0.000086  |
| C | -2.866314 | -3.770753 | -0.000055 |

|   |           |           |           |
|---|-----------|-----------|-----------|
| C | -1.567713 | -4.226817 | -0.000372 |
| C | -3.771268 | -0.202910 | 0.000445  |
| N | -2.632253 | 0.566843  | 0.000092  |
| C | -3.082847 | 1.848580  | 0.000328  |
| C | -4.554038 | 1.905989  | 0.000560  |
| C | -4.982351 | 0.624201  | 0.000727  |
| H | 5.991795  | 0.217494  | 0.001098  |
| H | 5.117504  | 2.836849  | 0.000825  |
| H | 1.227689  | -5.259691 | -0.001045 |
| H | 3.788083  | -4.347179 | -0.000452 |
| H | 1.258709  | -0.974175 | -0.000034 |
| H | 1.374963  | 5.491417  | -0.001275 |
| H | -1.374726 | 5.491491  | -0.001315 |
| H | -0.000004 | 1.466837  | 0.000882  |
| H | -1.258783 | -0.974127 | -0.000332 |
| H | -3.788249 | -4.347050 | 0.000081  |
| H | -1.227866 | -5.259651 | -0.000529 |
| H | -5.117414 | 2.837018  | 0.000611  |
| H | -5.991787 | 0.217713  | 0.000949  |
| N | -2.415097 | 2.997227  | -0.000159 |
| N | 2.415229  | 2.997167  | 0.000002  |
| N | 3.869781  | -1.526078 | 0.000352  |
| N | -3.869853 | -1.525953 | 0.000398  |

## HI

|   |           |           |           |
|---|-----------|-----------|-----------|
| C | 4.262045  | 3.385847  | 0.287646  |
| C | 2.949021  | 3.796862  | 0.239124  |
| C | 2.173035  | 2.617444  | -0.094713 |
| N | 2.980830  | 1.543785  | -0.209256 |
| C | 4.258916  | 1.956237  | 0.021933  |
| C | 5.309023  | -2.619715 | -0.146330 |
| C | 6.056041  | -1.458823 | -0.067171 |
| C | 5.143957  | -0.348490 | -0.041863 |
| N | 3.883230  | -0.890941 | -0.096121 |
| C | 3.914648  | -2.257260 | -0.135324 |
| C | 5.336052  | 1.040901  | 0.041529  |
| C | 2.762664  | -3.063758 | -0.108449 |
| C | -5.309019 | 2.619736  | 0.146407  |
| C | -6.056026 | 1.458839  | 0.067211  |
| C | -5.143933 | 0.348513  | 0.041850  |
| N | -3.883209 | 0.890973  | 0.096110  |
| C | -3.914643 | 2.257290  | 0.135380  |
| C | -2.762659 | 3.063786  | 0.108512  |
| C | -5.336029 | -1.040876 | -0.041602 |

|   |           |           |           |
|---|-----------|-----------|-----------|
| C | -0.784546 | -2.426075 | 0.340564  |
| N | 0.280333  | -3.210212 | -0.054575 |
| C | 1.486293  | -2.575636 | 0.229937  |
| C | 1.137916  | -1.373592 | 0.924327  |
| C | -0.236052 | -1.293470 | 0.993409  |
| C | -1.137962 | 1.373551  | -0.924210 |
| C | 0.236004  | 1.293408  | -0.993330 |
| C | 0.784534  | 2.426037  | -0.340553 |
| N | -0.280324 | 3.210203  | 0.054587  |
| C | -1.486301 | 2.575636  | -0.229875 |
| N | -2.980822 | -1.543808 | 0.209235  |
| C | -4.258905 | -1.956229 | -0.022020 |
| C | -4.262044 | -3.385830 | -0.287785 |
| C | -2.949027 | -3.796866 | -0.239241 |
| C | -2.173038 | -2.617471 | 0.094669  |
| H | 5.140129  | 3.998416  | 0.492053  |
| H | 2.569714  | 4.809475  | 0.376709  |
| H | 5.682339  | -3.642472 | -0.163635 |
| H | 7.141119  | -1.377041 | -0.027567 |
| H | 3.093792  | -0.226349 | -0.199644 |
| H | 6.354230  | 1.416840  | 0.157897  |
| H | 2.880101  | -4.119472 | -0.366871 |
| H | -5.682343 | 3.642490  | 0.163749  |
| H | -7.141103 | 1.377050  | 0.027612  |
| H | -3.093756 | 0.226385  | 0.199566  |
| H | -2.880086 | 4.119503  | 0.366927  |
| H | -6.354208 | -1.416804 | -0.157994 |
| H | 0.197349  | -4.023995 | -0.650356 |
| H | 1.845780  | -0.674028 | 1.357653  |
| H | -0.835463 | -0.516561 | 1.456879  |
| H | -1.845855 | 0.673973  | -1.357473 |
| H | 0.835391  | 0.516470  | -1.456782 |
| H | -0.197314 | 4.024010  | 0.650330  |
| H | -5.140130 | -3.998379 | -0.492244 |
| H | -2.569728 | -4.809478 | -0.376858 |

## H2

|   |          |           |           |
|---|----------|-----------|-----------|
| C | 4.194831 | 3.291716  | 0.398569  |
| C | 2.898610 | 3.742525  | 0.366344  |
| C | 2.096977 | 2.622747  | -0.108261 |
| N | 2.882594 | 1.543994  | -0.320765 |
| C | 4.156579 | 1.887440  | -0.005546 |
| C | 5.197736 | -2.547188 | -0.159049 |
| C | 5.912388 | -1.373227 | -0.091214 |

|   |           |           |           |
|---|-----------|-----------|-----------|
| C | 4.969124  | -0.272204 | -0.088942 |
| N | 3.717737  | -0.847403 | -0.146607 |
| C | 3.786011  | -2.214477 | -0.150556 |
| C | -5.197730 | 2.547192  | 0.159188  |
| C | -5.912381 | 1.373233  | 0.091314  |
| C | -4.969114 | 0.272212  | 0.088951  |
| N | -3.717727 | 0.847410  | 0.146598  |
| C | -3.786005 | 2.214484  | 0.150631  |
| C | -0.715580 | -2.462822 | 0.375908  |
| N | 0.364866  | -3.198178 | -0.066611 |
| C | 1.552736  | -2.560167 | 0.263652  |
| C | 1.183454  | -1.418370 | 1.060246  |
| C | -0.186815 | -1.368240 | 1.121361  |
| C | -1.183489 | 1.418316  | -1.060135 |
| C | 0.186779  | 1.368182  | -1.121293 |
| C | 0.715570  | 2.462806  | -0.375920 |
| N | -0.364862 | 3.198187  | 0.066596  |
| C | -1.552742 | 2.560158  | -0.263595 |
| N | -2.882599 | -1.544005 | 0.320740  |
| C | -4.156573 | -1.887428 | 0.005458  |
| C | -4.194815 | -3.291678 | -0.398749 |
| C | -2.898596 | -3.742492 | -0.366511 |
| C | -2.096977 | -2.622746 | 0.108193  |
| H | 5.092459  | 3.837807  | 0.683951  |
| H | 2.539491  | 4.743645  | 0.603521  |
| H | 5.577478  | -3.566698 | -0.153727 |
| H | 6.991965  | -1.247095 | -0.040181 |
| H | 2.919634  | -0.197686 | -0.275642 |
| H | -5.577475 | 3.566701  | 0.153930  |
| H | -6.991960 | 1.247101  | 0.040309  |
| H | -2.919615 | 0.197688  | 0.275554  |
| H | 0.326400  | -3.986620 | -0.701607 |
| H | 1.880298  | -0.747636 | 1.551989  |
| H | -0.806004 | -0.644822 | 1.642890  |
| H | -1.880352 | 0.747552  | -1.551812 |
| H | 0.805950  | 0.644733  | -1.642801 |
| H | -0.326374 | 3.986664  | 0.701548  |
| H | -5.092436 | -3.837749 | -0.684193 |
| H | -2.539472 | -4.743597 | -0.603739 |
| N | -5.195466 | -1.028610 | -0.013511 |
| N | -2.740671 | 3.032381  | 0.115693  |
| N | 5.195474  | 1.028624  | 0.013454  |
| N | 2.740677  | -3.032375 | -0.115622 |

## Reference

- 1 J. Ahrens, B. Geveci and C. Law, ParaView: An End-User Tool for Large-Data Visualization. In *Visualization Handbook*. 2005.
